# Supplementary material for: Ultra-Low-Dose Buprenorphine as a Time-Limited Treatment for Severe Suicidal Ideation: A Randomized Controlled Trial
Source: Atypon-hosted journal article supplement (doi:10.1176/appi.ajp.2015.15040535), 2015-12-18
Supplement: appi.ajp.2015.15040535.ds001.pdf [file appi.ajp.2015.15040535.ds001.pdf]

 


Psychiatry Online
