# Supplementary material for: Ultra-Low-Dose Buprenorphine as a Time-Limited Treatment for Severe Suicidal Ideation: A Randomized Controlled Trial
Source: Atypon-hosted journal article supplement (doi:10.1176/appi.ajp.2015.15040535), 2015-12-18
Supplement: appi.ajp.2015.15040535.ds001.pdf [file appi.ajp.2015.15040535.ds001.pdf]

**FIGURE S1. Study Medication Doses in Patients who Received Buprenorphine or Placebo<sup>a</sup>**

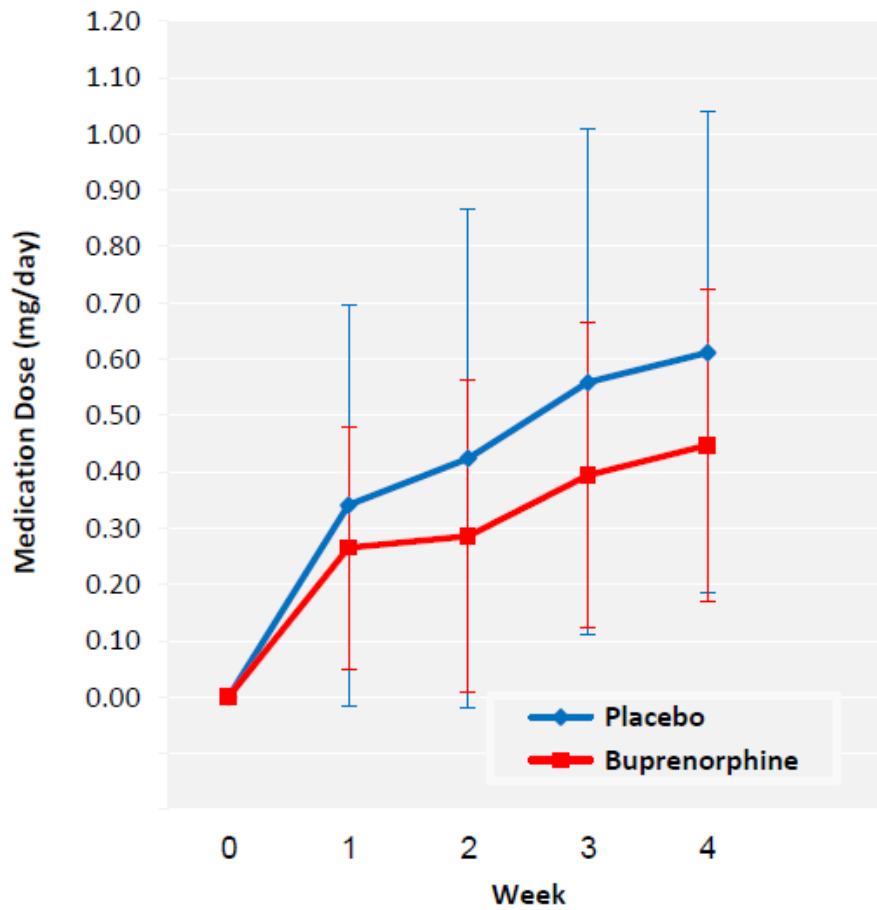

<sup>a</sup> Modified intention-to-treat group. The error bars indicate standard deviations. Differences in medication doses between the buprenorphine and placebo groups were not significant in both a week-by-week comparison and in an overall dose comparison.

**TABLE S1. Psychotropic Medications Taken by Patients in the Buprenorphine and Placebo Groups Upon Enrollment and During the Study Period**

| <b>Psychotropic Medications</b>               | <b>Buprenorphine<br/>(N=57)</b> | <b>Placebo (N=31)</b> |
|-----------------------------------------------|---------------------------------|-----------------------|
| <b>Antidepressants</b>                        | <b>40 (70.2)</b>                | <b>22 (71.0)</b>      |
| SSRI's                                        | 24 (42.1)                       | 11 (35.5)             |
| Citalopram                                    | 16 (28.1)                       | 9 (29.0)              |
| Paroxetine                                    | 5 (8.8)                         | 0 (0.0)               |
| Fluoxetine                                    | 2 (3.5)                         | 1 (3.2)               |
| Sertraline                                    | 1 (1.8)                         | 1 (3.2)               |
| SNRI's                                        | 10 (17.5)                       | 8 (25.8)              |
| Venlafaxine                                   | 5 (8.8)                         | 4 (12.9)              |
| Milnacipran                                   | 3 (5.3)                         | 0 (0.0)               |
| Duloxetine                                    | 2 (3.5)                         | 4 (12.9)              |
| Trazodone                                     | 5 (8.8)                         | 0 (0.0)               |
| Mirtazapine                                   | 3 (5.3)                         | 1 (3.2)               |
| Bupropion                                     | 2 (3.5)                         | 1 (3.2)               |
| Clomipramine                                  | 1 (1.8)                         | 0 (0.0)               |
| Reboxetine                                    | 1 (1.8)                         | 2 (6.5)               |
| Hypericum                                     | 0 (0.0)                         | 1 (3.2)               |
| <b>Benzodiazepines / Hypnotics</b>            | <b>31 (54.4)</b>                | <b>12 (38.7)</b>      |
| Clonazepam                                    | 14 (24.6)                       | 7 (22.6)              |
| Alprazolam                                    | 4 (7.0)                         | 2 (6.5)               |
| Oxazepam                                      | 5 (8.8)                         | 1 (3.2)               |
| Brotizolam                                    | 4 (7.0)                         | 1 (3.2)               |
| Zopiclone                                     | 4 (7.0)                         | 3 (9.7)               |
| Nitrazepam                                    | 3 (5.3)                         | 1 (3.2)               |
| Diazepam                                      | 3 (5.3)                         | 0 (0.0)               |
| Lorazepam                                     | 2 (3.5)                         | 0 (0.0)               |
| <b>Mood stabilizers /<br/>Anticonvulsants</b> | <b>9 (15.8)</b>                 | <b>6 (19.4)</b>       |
| Lamotrigine                                   | 5 (8.8)                         | 4 (12.9)              |
| Lithium                                       | 2 (3.5)                         | 0 (0.0)               |
| Pregabalin                                    | 1 (1.8)                         | 1 (3.2)               |
| Valproic acid                                 | 1 (1.8)                         | 0 (0.0)               |
| Carbamazepine                                 | 0 (0.0)                         | 1 (3.2)               |
| <b>Antipsychotics</b>                         | <b>14 (24.6)</b>                | <b>4 (12.9)</b>       |
| Quetiapine                                    | 8 (14.0)                        | 2 (6.5)               |
| Clotiapine                                    | 2 (3.5)                         | 0 (0.0)               |
| Olanzapine                                    | 2 (3.5)                         | 0 (0.0)               |
| Perphenazine                                  | 1 (1.8)                         | 2 (6.5)               |
| Aripiprazole                                  | 1 (1.8)                         | 0 (0.0)               |

Data are n (%). Participants who were taking more than one psychotropic medication were counted in every medication they were taking. SSRI's=selective serotonin-reuptake inhibitors. SNRI's=serotonin-norepinephrine reuptake inhibitors. Of the 62 participants who were taking antidepressant medications upon enrollment to the study, 51 (82%) were taking them for over 1 year.

**FIGURE S2. CONSORT Flow Diagram of Participants in a Double-Blind, Randomized, Placebo-Controlled Trial of Ultra-Low-Dose Buprenorphine for Suicidal Ideation**

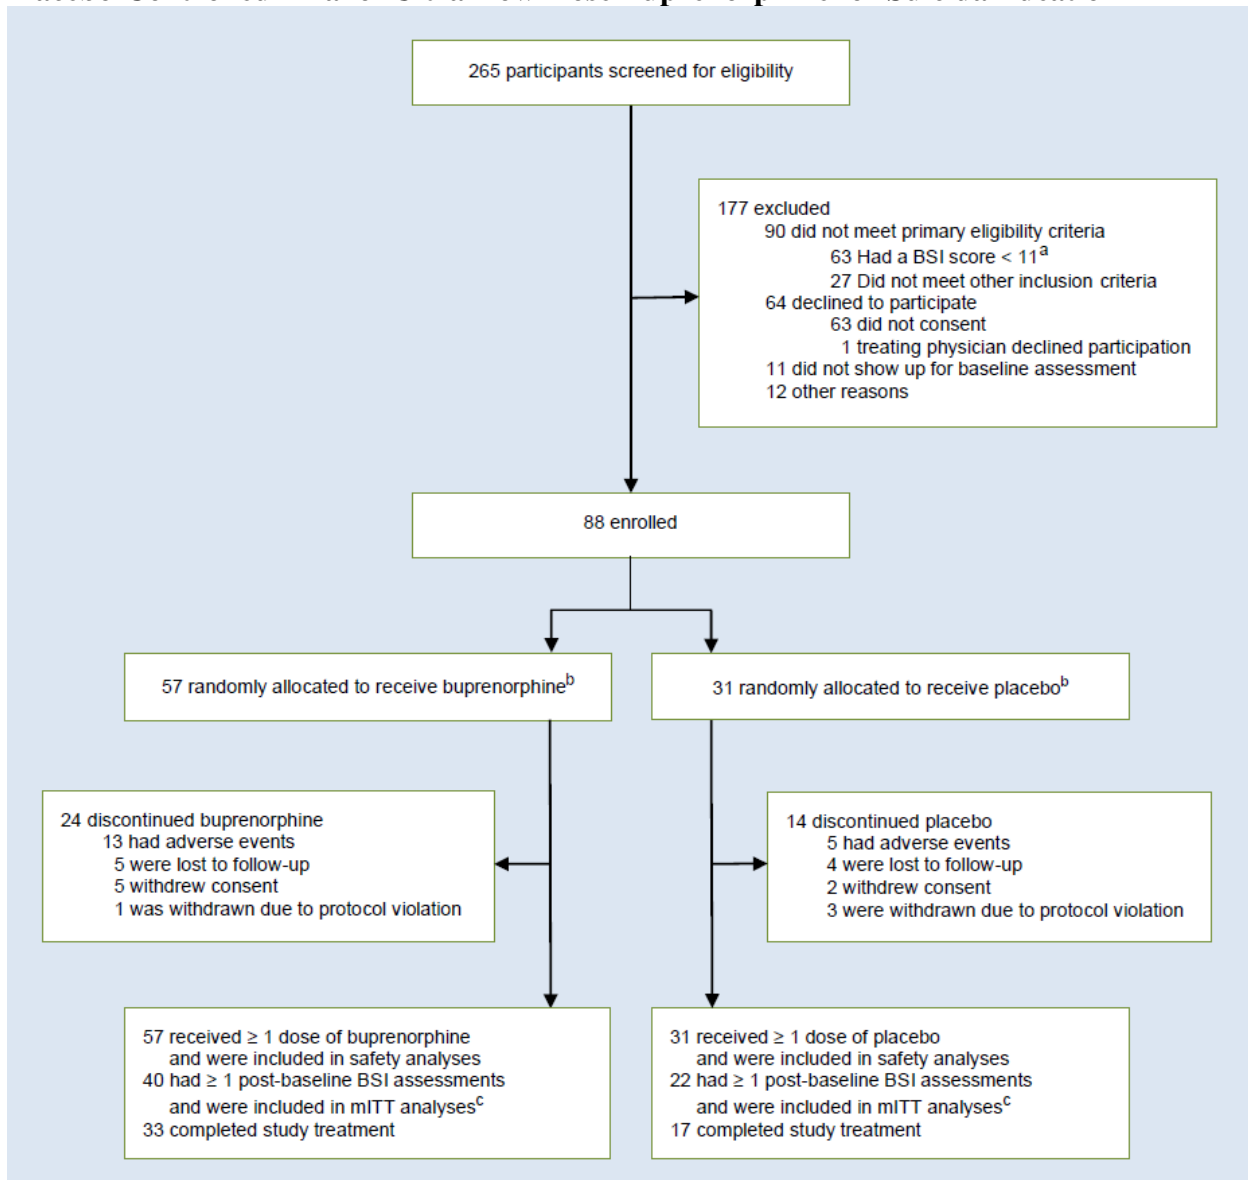

<sup>a</sup> BSI=Beck Scale for Suicide Ideation.

<sup>b</sup> Randomized at 2:1 ratio (buprenorphine:placebo).

<sup>c</sup> mITT=modified intention-to-treat. No differences were found in the baseline demographic and clinical characteristics of participants included in the mITT analyses compared with those who were not included.

**FIGURE S3. Beck Scale for Suicide Ideation and Beck Depression Inventory Scores at the Beginning and End of Treatment<sup>a</sup>**

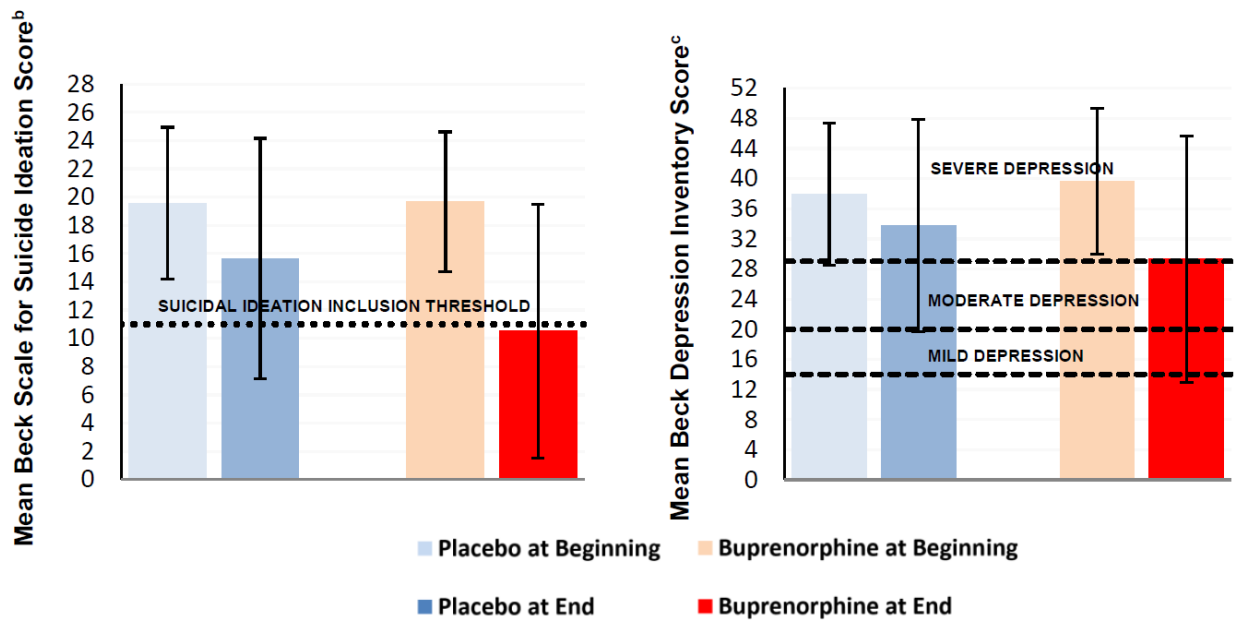

<sup>a</sup> Modified intention-to-treat group. Values are group means at the beginning and end of treatment, last observation carried forward. The error bars indicate standard deviations. Lowest score is best.

<sup>b</sup> Mean Beck Scale for Suicide Ideation scores in the buprenorphine group decreased by about 50% during treatment, to a score slightly below the suicidal ideation inclusion threshold for this study (Clum and Yang, 1995).

<sup>c</sup> Mean Beck Depression Inventory scores in the buprenorphine group decreased by about 25% during treatment, to a score still in the “moderate-to-severe depression” range (Beck et al., 1996).

**FIGURE S4. Changes from Baseline to Endpoint (Last Observation Carried Forward) in Beck Depression Inventory Scores of Patients With and Without Depression who Received Buprenorphine or Placebo<sup>a</sup>**

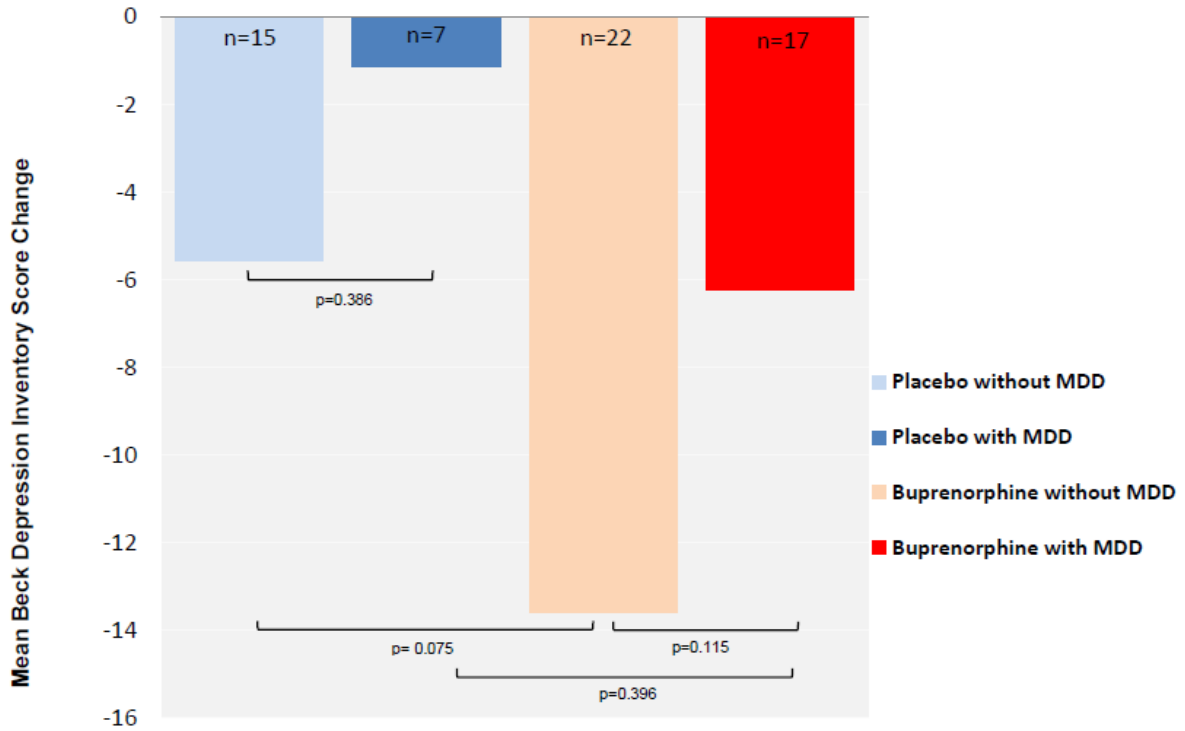

<sup>a</sup> Modified intention-to-treat group. Lowest score is best. MDD=Major depressive disorder

**TABLE S2. Adverse Events in Patients with Suicidal Ideation Receiving Buprenorphine or Placebo<sup>a</sup>**

| Adverse Events                           | Buprenorphine (N=57) |      | Placebo (N=31) |      |
|------------------------------------------|----------------------|------|----------------|------|
|                                          | N                    | %    | N              | %    |
| <b>Non-Serious</b>                       |                      |      |                |      |
| Fatigue                                  | 28                   | 49.1 | 7              | 22.6 |
| Dizziness                                | 23                   | 40.4 | 7              | 22.6 |
| Nausea                                   | 21                   | 36.8 | 4              | 12.9 |
| Headache                                 | 18                   | 31.6 | 6              | 19.4 |
| Dry mouth                                | 17                   | 29.8 | 3              | 9.7  |
| Constipation                             | 15                   | 26.3 | 3              | 9.7  |
| Weakness                                 | 15                   | 26.3 | 6              | 19.4 |
| Blurred vision                           | 9                    | 15.8 | 3              | 9.7  |
| Sweating                                 | 8                    | 14.0 | 2              | 6.5  |
| Confusion                                | 7                    | 12.3 | 3              | 9.7  |
| Itching                                  | 6                    | 10.5 | 4              | 12.9 |
| Low blood pressure                       | 6                    | 10.5 | 2              | 6.5  |
| Euphoria                                 | 6                    | 10.5 | 1              | 3.2  |
| Rapid heart rate                         | 5                    | 8.8  | 2              | 6.5  |
| Hypoventilation                          | 4                    | 7.0  | 1              | 3.2  |
| Slurred speech                           | 4                    | 7.0  | 3              | 9.7  |
| Shortness of breath                      | 2                    | 3.5  | 1              | 3.2  |
| Vomiting                                 | 2                    | 3.5  | 0              | 0.0  |
| <b>Serious</b>                           |                      |      |                |      |
| Suicide attempt                          | 1                    | 1.8  | 1              | 3.2  |
| Psychiatric hospitalization <sup>b</sup> | 0                    | 0.0  | 1              | 3.2  |
| Psychosis                                | 2                    | 3.5  | 1              | 3.2  |

<sup>a</sup> Safety sample. Participants may have reported more than one event. Events with an incidence of at least 2% in either group are shown.

<sup>b</sup> One patient from the placebo group who made a suicide attempt was subsequently hospitalized.
